# Supplementary material for: INMI1 Zika Virus NS4B Antagonizes the Interferon Signaling by Suppressing STAT1 Phosphorylation
Source: MDPI journal article supplement (doi:10.3390/v13122448), 2021-12-06
Supplement: s1 [file s1]

# SUPPLEMENTARY FILES

Fanunza et al. 2021. INMI1 Zika Virus NS4B Antagonizes the Interferon Signaling by suppressing STAT1 phosphorylation

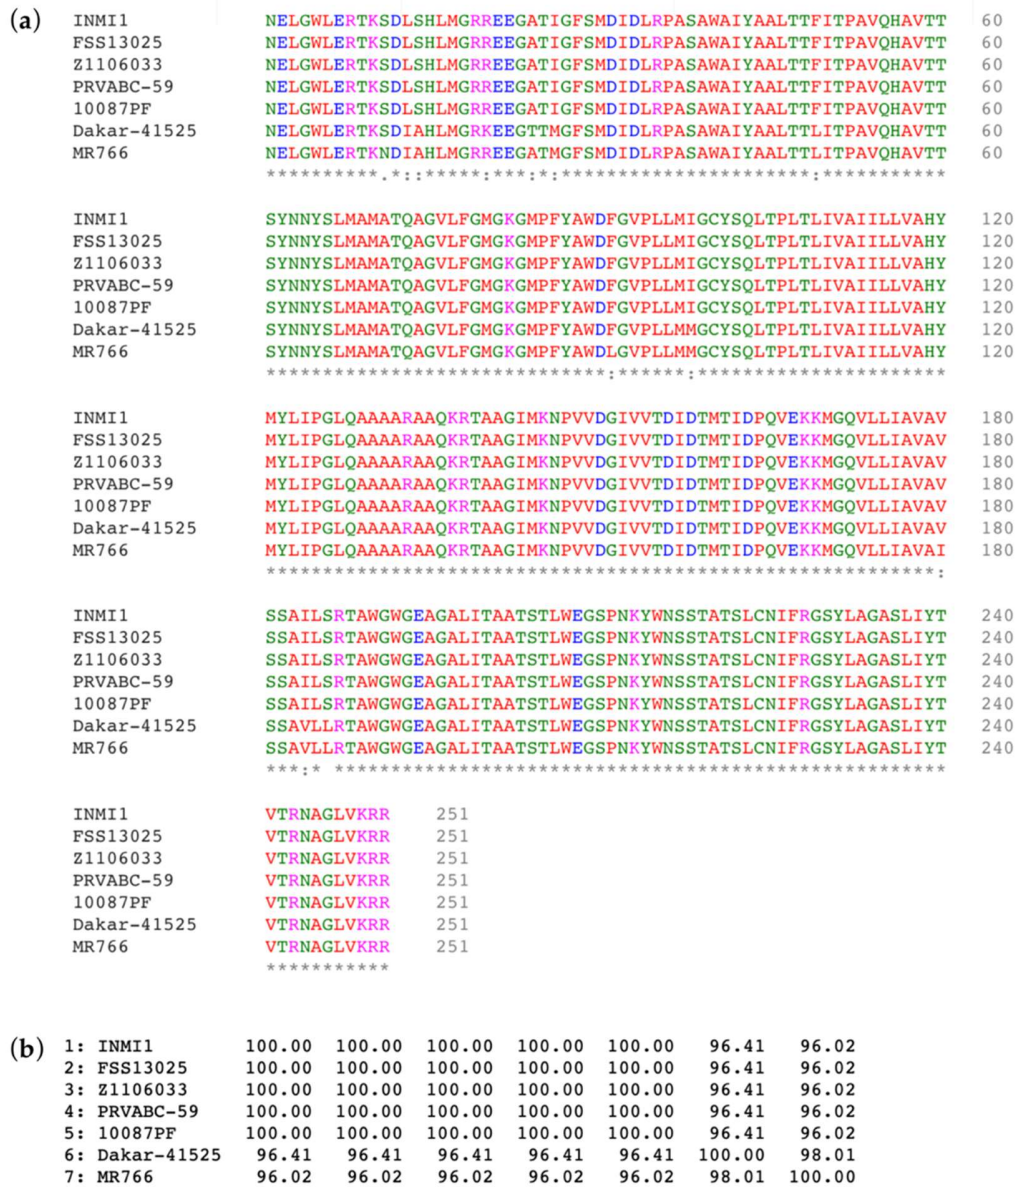

**Figure S1.** (a) Amino acid alignment of INMI1 KU991811 NS4B and other ZIKV strains with (b) percentage identity matrix. Amino acid sequence aligned were INMI1 (GenBank KU991811.1), FSS13025 (Uniprot ZIKVK A0A142I5B9), Z1106033 (GenBank KU312312.1), PRVABC-59 (Gen Bank KX377337.1), Dakar-41525 (GenBank MG758786.1), MR766 (Uniprot ZIKV sp|Q32ZE1|), 10087PF (Uniprot ZIKVF sp|A0A024B7W1|).

| (a) | Viral strain        | Identity, % |
|-----|---------------------|-------------|
|     | DEN26 sp P29990     | 52.4        |
|     | DEN27 sp P29991     | 52.4        |
|     | DEN2N sp P14340     | 53.3        |
|     | DEN28 sp P14337     | 53.3        |
|     | DEN2J sp P07564     | 52.9        |
|     | DEN2P sp P12823     | 53.7        |
|     | DEN2Q sp Q9WDA6     | 53.3        |
|     | DEN4H sp Q2YHF2     | 49.6        |
|     | DEN4P sp Q58HT7     | 50.0        |
|     | DEN4T sp Q2YHF0     | 49.6        |
|     | DEN4D sp P09866     | 49.6        |
|     | DEN4S sp Q5UCB8     | 49.6        |
|     | DEN1S sp P33478     | 51.4        |
|     | DEN1W sp P17763     | 51.0        |
|     | DEN1B sp P27909     | 51.0        |
|     | DEN3M sp Q6YMS3     | 51.6        |
|     | DEN3S sp Q6YMS4     | 51.6        |
|     | DEN3I sp Q5UB51     | 50.8        |
|     | ZIKV KU991811.1     | 100.0       |
|     | ZIKVF sp A0A024B7W1 | 100.0       |
|     | ZIKV sp Q32ZE1      | 94.8        |
|     | SPOV A0A1I9RZV1     | 82.1        |
|     | SPOV A0A1I9RZV2     | 82.1        |
|     | SPOV A0A2L1GGB4     | 81.3        |
|     | SPOV  C8XPB6        | 82.1        |
|     | KUNV sp P14335      | 43.0        |
|     | WNV9 sp Q9Q6P4      | 43.4        |
|     | WNV sp P06935       | 42.4        |
|     | USUV sp Q5WPU5      | 45.4        |
|     | JEV1 sp P27395      | 47.2        |
|     | JEV5 sp P19110      | 47.2        |
|     | JEVJ sp P32886      | 46.8        |
|     | YFVU sp Q1X880      | 32.9        |
|     | YFVE sp Q074N0      | 33.3        |
|     | YFVN sp Q1X881      | 33.7        |
|     | YFVT sp Q9YRV3      | 33.5        |
|     | YFVF sp Q89277      | 33.5        |
|     | YFVI sp Q98803      | 33.1        |
|     | YFVC sp Q6J3P1      | 33.1        |
|     | YFV1 sp P03314      | 32.2        |
|     | YFVA sp Q6DV88      | 33.1        |
|     | POWVL sp Q04538     | 27.1        |
|     | LGTV LP21 sp P29837 | 27.1        |
|     | TBEVS sp P07720     | 26.0        |
|     | TBEVH sp Q01299     | 27.1        |
|     | TBEVW sp P14336     | 27.1        |

| (b) | Viral strain    | Identity, % |
|-----|-----------------|-------------|
|     | ZIKV KU991811.1 | 100.0       |
|     | DEN2P sp P12823 | 53.7        |
|     | DEN26 sp P29990 | 52.9        |
|     | DEN27 sp P29991 | 52.9        |
|     | DEN2Q sp Q9WDA6 | 52.9        |
|     | DEN2N sp P14340 | 52.9        |
|     | DEN28 sp P14337 | 52.9        |
|     | DEN2J sp P07564 | 52.0        |
|     | DEN1S sp P33478 | 49.2        |
|     | DEN3M sp Q6YMS3 | 48.8        |
|     | DEN3S sp Q6YMS4 | 48.8        |
|     | DEN3I sp Q5UB51 | 48.8        |
|     | DEN1W sp P17763 | 48.4        |
|     | DEN1B sp P27909 | 48.4        |
|     | DEN4P sp Q58HT7 | 47.5        |
|     | DEN4S sp Q5UCB8 | 46.7        |
|     | DEN4T sp Q2YHF0 | 46.7        |
|     | DEN4H sp Q2YHF2 | 46.7        |
|     | DEN4D sp P09866 | 46.7        |

**Figure S2.** Phylogenetic analysis of NS4B. Amino acid identity matrix of (a) entire NS4B protein and (b) partial NS4B<sub>1-125</sub>.

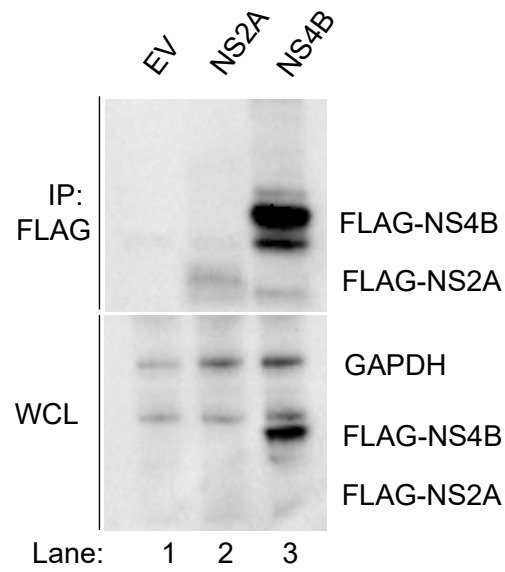

**Figure S3.** Immunoprecipitation of FLAG-tagged NS2A and NS4B using anti-FLAG magnetic beads (IP:FLAG); immunoprecipitated proteins were detected by Western blot with antibodies to FLAG. The presence of transfected protein in whole cell extracts (WCE) was verified by detection with the corresponding antibody.
